# Supplementary material for: Photocatalytic degradation of methylene blue under visible light by cobalt ferrite nanoparticles/graphene quantum dots
Source: publisher site journal article supplement (doi:10.3762/bjnano.15.43), 2024-04-29
Supplement: Additional file 1 [file 2190-4286-15-43-S1.pdf]

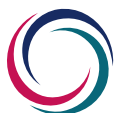

## Supporting Information

for

### **Photocatalytic degradation of methylene blue under visible light by cobalt ferrite nanoparticles/graphene quantum dots**

Vo Chau Ngoc Anh, Le Thi Thanh Nhi, Le Thi Kim Dung, Dang Thi Ngoc Hoa, Nguyen Truong Son, Nguyen Thi Thao Uyen, Nguyen Ngoc Uyen Thu, Le Van Thanh Son, Le Trung Hieu, Tran Ngoc Tuyen and Dinh Quang Khieu

*Beilstein J. Nanotechnol.* **2024**, *15*, 475–489. [doi:10.3762/bjnano.15.43](https://doi.org/10.3762/bjnano.15.43)

### **Detailed information on MS spectra and HPLC diagram**

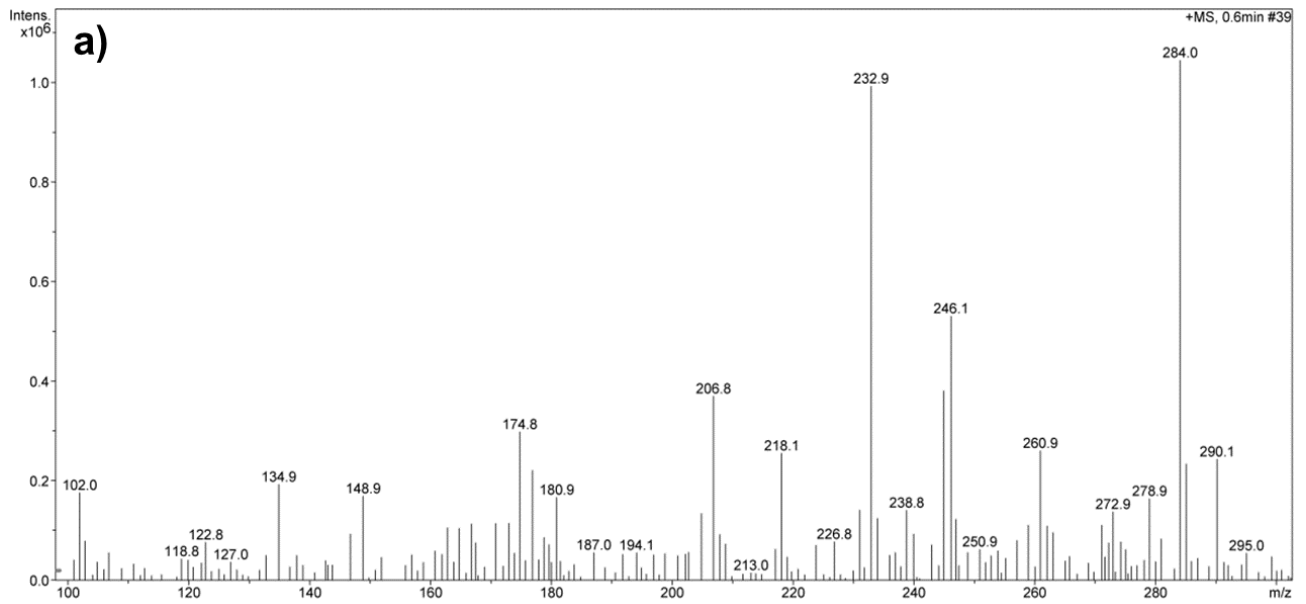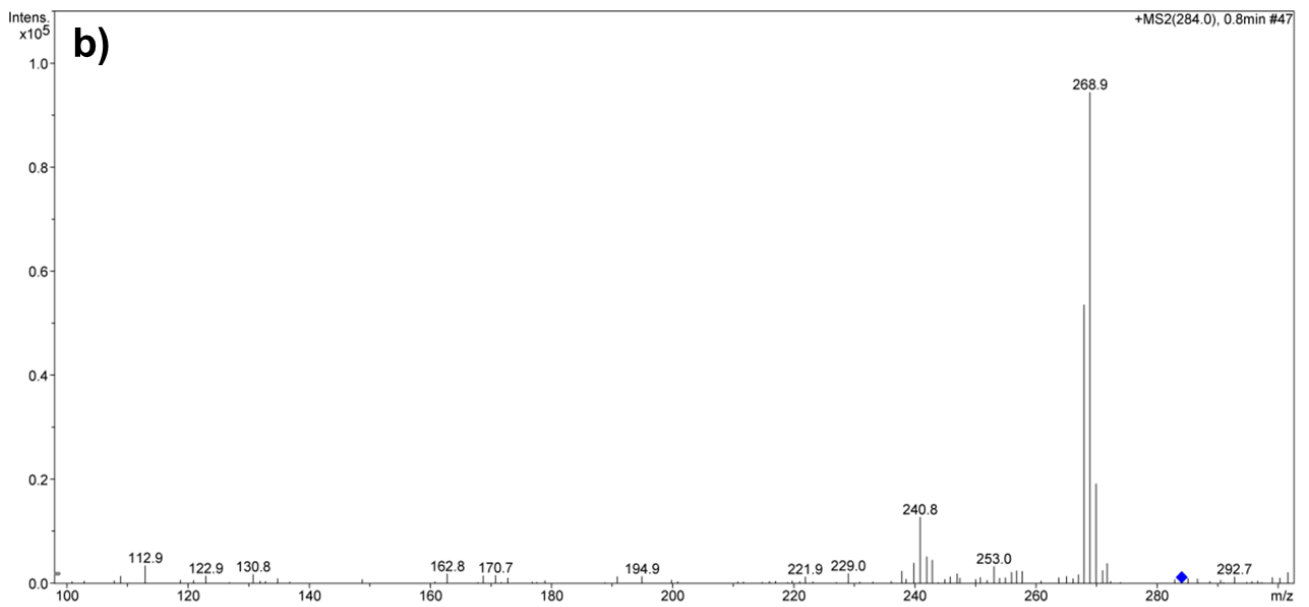

**Figure S1:** Fragmentation spectrum of MB a)  $m/z = 284$ , b)  $m/z = 268$ .

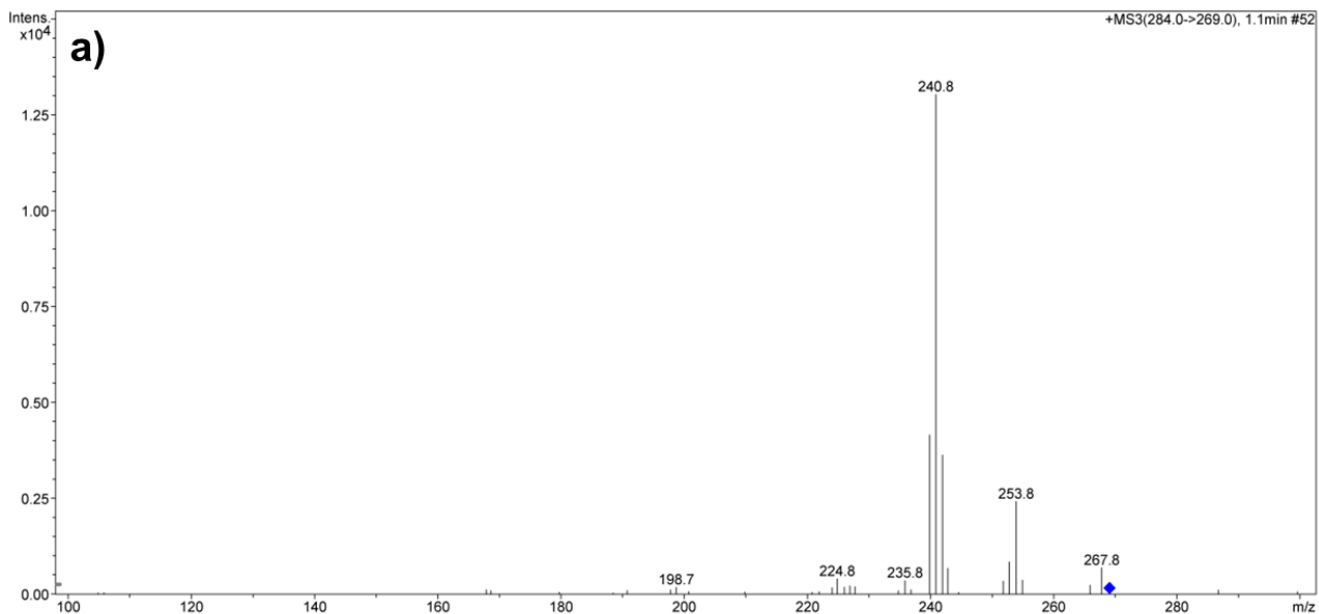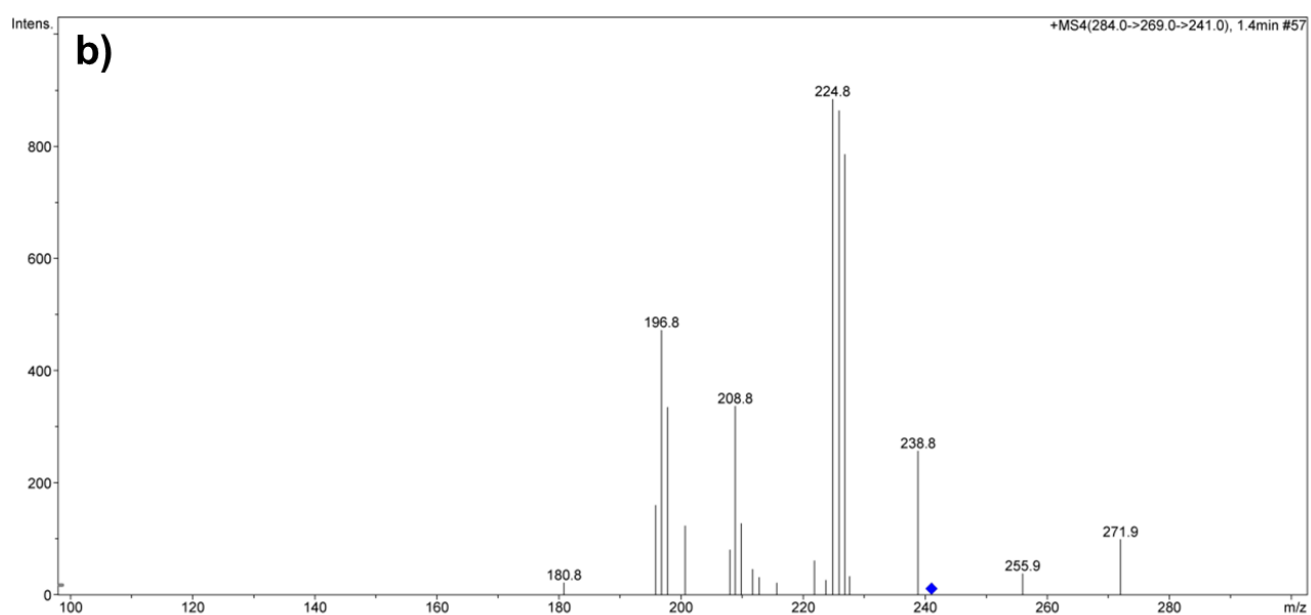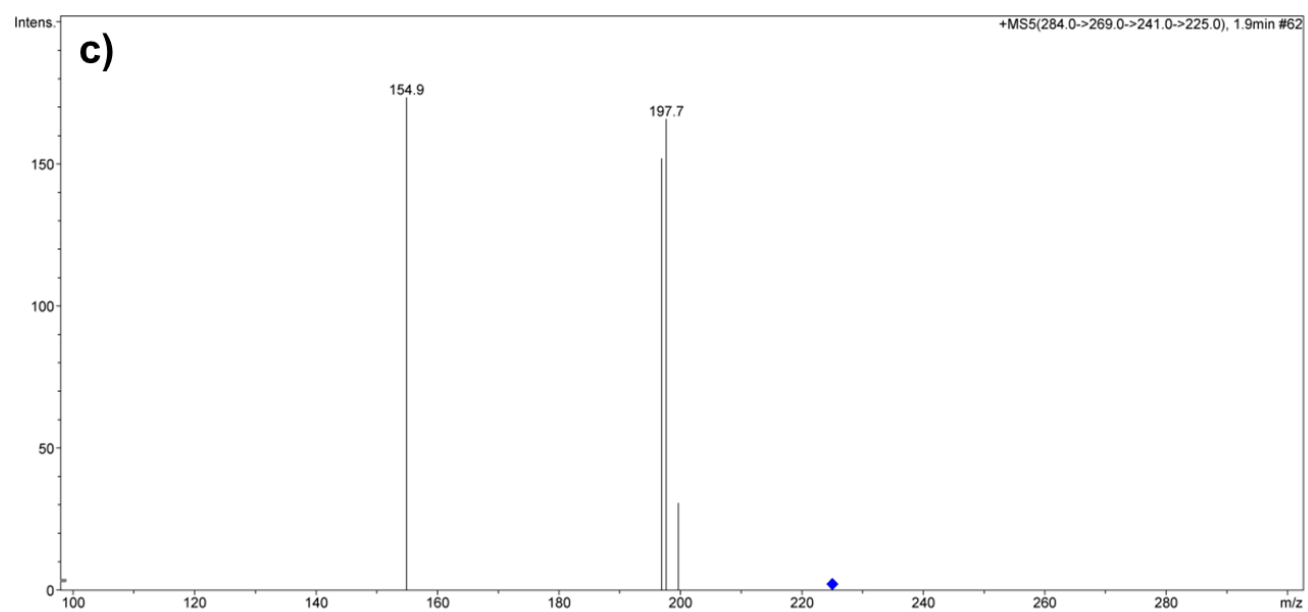

**Figure S2:** Fragmentation spectrum of MB a)  $m/z = 240.8$ , b)  $m/z = 224.8$  and c)  $m/z = 154.9$ .

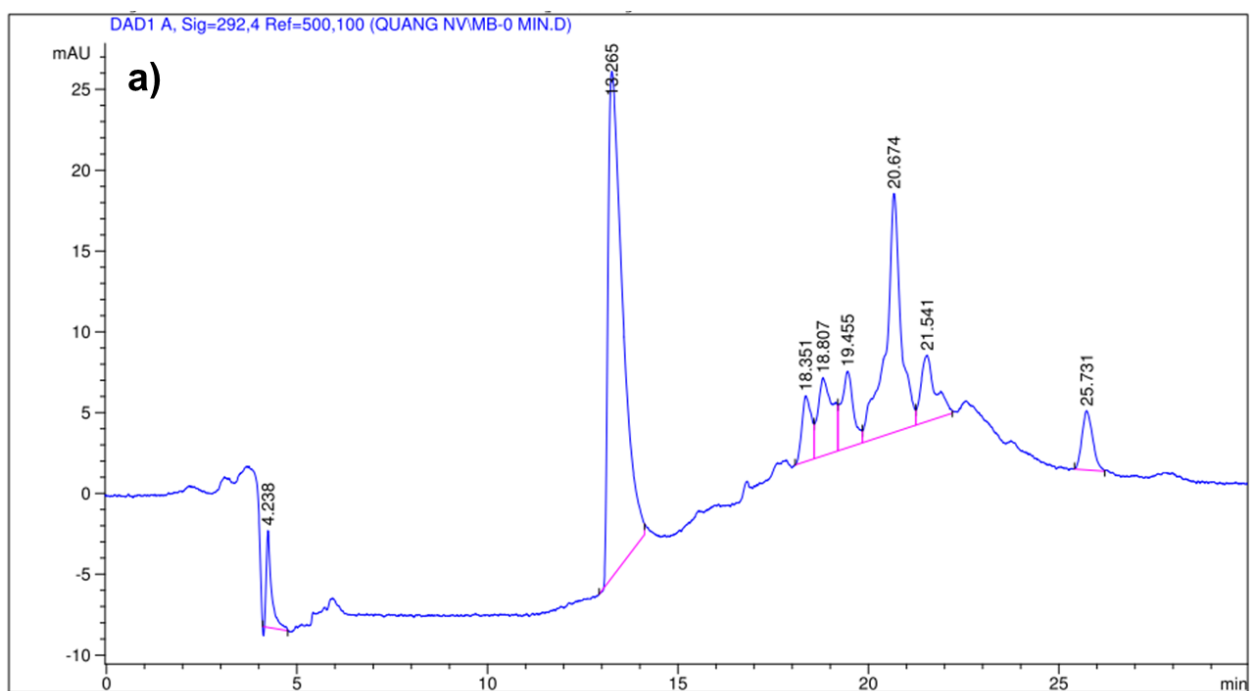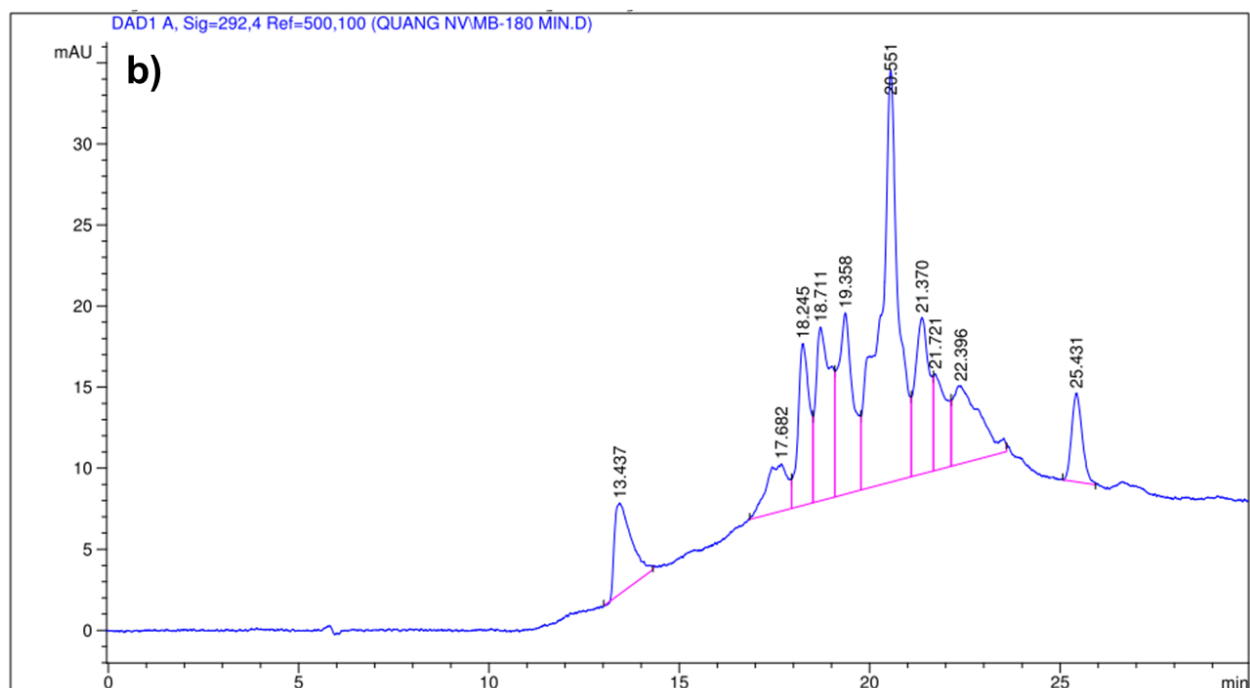

**Figure S3:** HPLC of MB at a) initial and b) 180 min.
